# Supplementary material for: Developing a systematic method for extraction of microplastics in soils
Source: Royal Society of Chemistry journal article supplement (doi:10.1039/d0ay02086a), 2021-01-01

## **Supplementary Material: Developing a systematic method for extraction of microplastics in soils**

Freya Radford<sup>a\*</sup>, Lina M. Zapata-Restrepo<sup>b</sup>, Alice A. Horton<sup>c</sup>, Malcolm D. Hudson<sup>b</sup>, Peter J. Shaw<sup>b</sup>, Ian D. Williams<sup>a</sup>

<sup>a</sup> Faculty of Engineering and Physical Sciences, University of Southampton, Highfield Campus, University Road, Southampton SO17 1BJ, United Kingdom

<sup>b</sup> Faculty of Environmental and Life Sciences, University of Southampton, Highfield Campus, University Road, Southampton SO17 1BJ, United Kingdom

<sup>c</sup> National Oceanography Centre, European Way, Southampton, SO14 SZH, UK

Corresponding author: [f.radford@soton.ac.uk](mailto:f.radford@soton.ac.uk)

## Supplementary Materials

|                                                                                                                                                                                                                                                                                                                                                                                                                                                                                                                                                                                                                     |   |
|---------------------------------------------------------------------------------------------------------------------------------------------------------------------------------------------------------------------------------------------------------------------------------------------------------------------------------------------------------------------------------------------------------------------------------------------------------------------------------------------------------------------------------------------------------------------------------------------------------------------|---|
| Table S 1. Particle size distribution (proportion of clay, silt and sand) for inorganic soils used in the experiment measured using the hydrometer method (Sheldrick and Wang, 1993). .....                                                                                                                                                                                                                                                                                                                                                                                                                         | 3 |
| Table S 2. Statistical analysis results for Kruskal Wallis tests to measure differences in: the amount of organic removed from samples of initial high and low organic content by different chemicals and by those chemicals at different temperatures; the recovery efficiency of microplastics from inorganic soils using density separation methods; the recovery efficiency of microplastics from organic soils using a combination of digestion and density separation methods; and the ease of identification of microplastics subjected to different treatments, split into temperatures and chemicals. .... | 4 |
| Table S 3. Statistical analysis results for Wilcoxon tests to measure differences in: the amount of organic matter removed from samples of high and low initial organic at 40 and 50°C; the amount of organic removed across all treatments in low and high organic; and the recovery efficiency in inorganic soils using canola oil with and without the use of ultrasound. ....                                                                                                                                                                                                                                   | 5 |
| Table S 4. Statistical analysis results for one-way ANOVA's to measure differences in: the amount of organic removed across reagents with and without the inclusion of dispersant; recovery efficiency of total microplastics, fragments and small microplastics from inorganic soils using different density separation treatments; and recovery efficiency of total microplastics, fragments and big microplastics from organic soils using different treatments combining digestion and density separation. ....                                                                                                 | 5 |
| Table S 5. Statistical analysis results for t-tests to measure differences in the recovery efficiency in inorganic soils using ZnCl <sub>2</sub> and NaCl with and without the use of ultrasound. ....                                                                                                                                                                                                                                                                                                                                                                                                              | 5 |
| Table S 6. Statistical analysis results for Spearman's Rank correlations to determine relationships between; the amount of clay in inorganic soils and the recovery efficiency; the organic content in a sample and the recovery of total microplastics, fragments, small microplastics, PET fragments and small LDPE. ....                                                                                                                                                                                                                                                                                         | 6 |
| Figure S 1. Percentage organic matter removed from soils with initially high organic content (~70%) using three digestion methods (Fenton's reagent, hydrogen peroxide and potassium hydroxide) with and without the use of a dispersant (sodium hexametaphosphate) .....                                                                                                                                                                                                                                                                                                                                           | 6 |
| Figure S 2. Total microplastic recovery from low organic (left) and organic (right) soils using the three density separation methods (ZnCl <sub>2</sub> , NaCl and canola oil) in the first and second round of extraction. ....                                                                                                                                                                                                                                                                                                                                                                                    | 7 |
| Figure S 3. Total microplastic recovery from inorganic soils using the three density separation methods (ZnCl <sub>2</sub> , NaCl and canola oil) with (+US) and without (-US) the inclusion of an ultrasound step .....                                                                                                                                                                                                                                                                                                                                                                                            | 7 |
| Figure S 4. FT-IR spectra for a sample of microplastic spikes using the experiment when treated with density treatments involving NaCl, ZnCl <sub>2</sub> , oil and ultrasound (a. big PVC b. small PVC c. small PS d. small LDPE). ....                                                                                                                                                                                                                                                                                                                                                                            | 8 |
| Figure S 5. FT-IR spectra for a sample of microplastic spikes using the experiment when treated with digestion treatments involving Fenton's reagent, potassium hydroxide and hydrogen peroxide at 40 and 50°C. (a. small LDPE b. PET fragments c. PP fragments d. large PVC ) .....                                                                                                                                                                                                                                                                                                                                | 9 |

Table S 1. Particle size distribution (proportion of clay, silt and sand) for inorganic soils used in the experiment measured using the hydrometer method (Sheldrick and Wang, 1993).

|               | Clay (%) | Silt (%) | Sand (%) |
|---------------|----------|----------|----------|
| <b>Soil 1</b> | 0.0      | 14.4     | 85.6     |
| <b>Soil 2</b> | 14.4     | 24.0     | 61.6     |
| <b>Soil 3</b> | 21.2     | 29.2     | 49.6     |
| <b>Soil 4</b> | 36.2     | 26.5     | 37.3     |
| <b>Soil 5</b> | 42.6     | 37.3     | 20.2     |
| <b>Soil 6</b> | 52.7     | 46.5     | 0.8      |

Table S 2. Statistical analysis results for Kruskal Wallis tests to measure differences in: the amount of organic removed from samples of initial high and low organic content by different chemicals and by those chemicals at different temperatures; the recovery efficiency of microplastics from inorganic soils using density separation methods; the recovery efficiency of microplastics from organic soils using a combination of digestion and density separation methods; and the ease of identification of microplastics subjected to different treatments, split into temperatures and chemicals.

|                                             |                          | Kruskal Wallis |    |       |                                                                                                                      |
|---------------------------------------------|--------------------------|----------------|----|-------|----------------------------------------------------------------------------------------------------------------------|
|                                             |                          | $X_2$          | df | p     |                                                                                                                      |
| <b>Organic matter removed</b>               | Low organic              | 11.41          | 2  | <0.01 | Reagent only (H <sub>2</sub> O <sub>2</sub> , Fenton's and KOH)                                                      |
|                                             | High organic             | 9.58           | 2  | <0.01 |                                                                                                                      |
|                                             | Low organic              | 10.43          | 5  | >0.05 | Reagent and temperature (H <sub>2</sub> O <sub>2</sub> , Fenton's and KOH at 40 and 50°C)                            |
|                                             | High organic             | 15.69          | 5  | <0.01 |                                                                                                                      |
| <b>Recovery efficiency (inorganic soil)</b> | fibres                   | 17.26          | 2  | <0.01 | By treatments (NaCl, ZnCl <sub>2</sub> and canola oil)                                                               |
|                                             | big                      | 12.29          | 2  | <0.01 |                                                                                                                      |
|                                             | PET fragments            | 48.78          | 2  | <0.01 |                                                                                                                      |
|                                             | PET fibres               | 59.25          | 2  | <0.01 |                                                                                                                      |
|                                             | HDPE (0.5-1 mm)          | 8.16           | 2  | <0.05 |                                                                                                                      |
|                                             | HDPE (0.25- 0.5 mm)      | 15.6           | 2  | <0.01 |                                                                                                                      |
|                                             | Big PVC                  | 44.31          | 2  | <0.01 |                                                                                                                      |
|                                             | PVC (0.25- 0.5 mm)       | 46.33          | 2  | <0.01 |                                                                                                                      |
|                                             | Big PS                   | 8.32           | 2  | <0.05 |                                                                                                                      |
|                                             | PS (0.25- 0.5 mm)        | 9.66           | 2  | <0.01 |                                                                                                                      |
|                                             | PP fragments             | 11.99          | 2  | <0.01 |                                                                                                                      |
| <b>Recovery efficiency (organic soil)</b>   | Fibres                   | 9.14           | 8  | >0.05 | By treatments (H <sub>2</sub> O <sub>2</sub> followed by NaCl, ZnCl <sub>2</sub> and canola oil)                     |
|                                             | Fragments (0.25- 0.5 mm) | 14.84          | 8  | >0.05 |                                                                                                                      |
|                                             | PET fragments            | 18.89          | 2  | <0.01 |                                                                                                                      |
|                                             | PET fibres               | 6.49           | 2  | <0.05 |                                                                                                                      |
|                                             | PVC big                  | 25.98          | 2  | <0.01 |                                                                                                                      |
|                                             | PVC (0.25- 0.5 mm)       | 23.06          | 2  | <0.01 |                                                                                                                      |
|                                             | PS (0.25- 0.5 mm)        | 20.64          | 2  | <0.01 |                                                                                                                      |
| <b>HQI</b>                                  | Treatments               | 5.69           | 5  | >0.05 | At 40 and 50°C: H <sub>2</sub> O <sub>2</sub> , Fentons and KOH. NaCl, ZnCl <sub>2</sub> and canola oil, ultrasound. |
|                                             | Chemicals                | 2.96           | 2  | >0.05 |                                                                                                                      |
|                                             | Temperatures             | 0.02           | 1  | >0.05 |                                                                                                                      |

Table S 3. Statistical analysis results for Wilcox tests to measure differences in: the amount of organic matter removed from samples of high and low initial organic at 40 and 50°C; the amount of organic removed across all treatments in low and high organic; and the recovery efficiency in inorganic soils using canola oil with and without the use of ultrasound.

|                                             |                             | Wilcox Test |       |                                    |
|---------------------------------------------|-----------------------------|-------------|-------|------------------------------------|
|                                             |                             | W           | p     |                                    |
| <b>Organic matter removed</b>               | Low organic                 | 34          | >0.05 | Between temperatures (40 and 50°C) |
|                                             | High organic                | 60          | >0.05 |                                    |
|                                             | All treatments              | 104         | >0.05 | Between low and high organic       |
| <b>Recovery efficiency (inorganic soil)</b> | With and without ultrasound | -1.805      | >0.05 | Canola oil only                    |

Table S 4. Statistical analysis results for one-way ANOVA's to measure differences in: the amount of organic removed across reagents with and without the inclusion of dispersant; recovery efficiency of total microplastics, fragments and small microplastics from inorganic soils using different density separation treatments; and recovery efficiency of total microplastics, fragments and big microplastics from organic soils using different treatments combining digestion and density separation.

|                                             |                              | ANOVA |      |       |                                                                        |
|---------------------------------------------|------------------------------|-------|------|-------|------------------------------------------------------------------------|
|                                             |                              | F     | df   | p     |                                                                        |
| <b>Organic matter removed</b>               | Dispersant vs. no dispersant | 20.61 | 2,12 | <0.01 | Between reagents (H <sub>2</sub> O <sub>2</sub> , Fenton's and KOH)    |
| <b>Recovery efficiency (inorganic soil)</b> | Total microplastics          | 20.77 | 2,51 | <0.01 | Difference between treatments (NaCl, ZnCl <sub>2</sub> and canola oil) |
|                                             | Fragments                    | 7.34  | 2,51 | <0.01 |                                                                        |
|                                             | small                        | 4.11  | 2,51 | <0.05 |                                                                        |
| <b>Recovery efficiency (organic soil)</b>   | Total microplastics          | 7.95  | 2,51 | <0.01 | Difference between treatments                                          |
|                                             | fragment                     | 8.08  | 2,45 | <0.05 |                                                                        |
|                                             | big                          | 5.83  | 2,45 | <0.01 |                                                                        |

Table S 5. Statistical analysis results for t-tests to measure differences in the recovery efficiency in inorganic soils using ZnCl<sub>2</sub> and NaCl with and without the use of ultrasound.

|                                      |                   | T Test |    |       |
|--------------------------------------|-------------------|--------|----|-------|
|                                      |                   | t      | df | p     |
| <b>Ultra sound vs. no ultrasound</b> | ZnCl <sub>2</sub> | 1.14   | 32 | >0.05 |
|                                      | NaCl              | 1.18   | 34 | >0.05 |

Table S 6. Statistical analysis results for Spearman's Rank correlations to determine relationships between; the amount of clay in inorganic soils and the recovery efficiency; the organic content in a sample and the recovery of total microplastics, fragments, small microplastics, PET fragments and small LDPE.

|                                                            |                                                              | Spearman's rank |       |
|------------------------------------------------------------|--------------------------------------------------------------|-----------------|-------|
|                                                            |                                                              | $r_s$           | p     |
| <b>Organic matter content vs. recovery with canola oil</b> | Amount of clay in sample vs. recovery of total microplastics | 0.04            | >0.05 |
|                                                            | Total microplastics                                          | 0.5             | <0.05 |
|                                                            | Fragment                                                     | 0.57            | <0.05 |
|                                                            | small                                                        | 0.48            | <0.05 |
|                                                            | PET fragments                                                | 0.69            | <0.01 |
|                                                            | Small LDPE                                                   | 0.55            | <0.05 |

Figure S 1. Percentage organic matter removed from soils with initially high organic content (~70%) using three digestion methods (Fenton's reagent, hydrogen peroxide and potassium hydroxide) with and without the use of a dispersant (sodium hexametaphosphate)

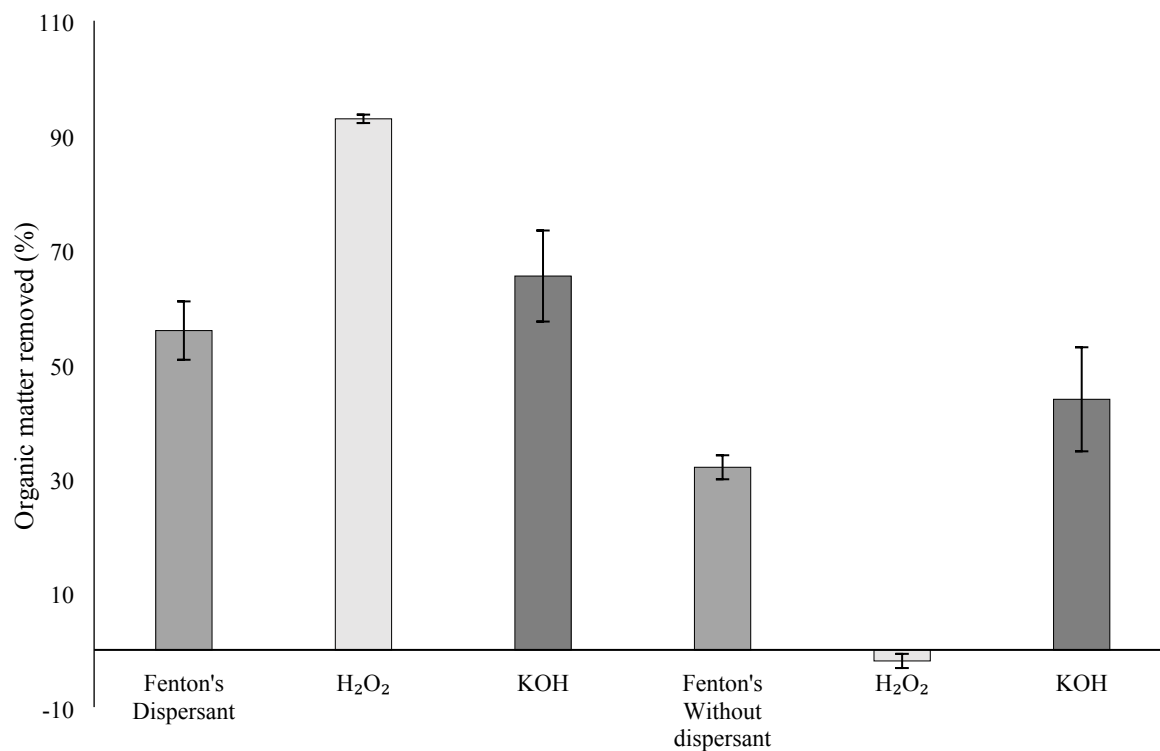

Figure S 2. Total microplastic recovery from low organic (left) and organic (right) soils using the three density separation methods (ZnCl<sub>2</sub>, NaCl and canola oil) in the first and second round of extraction.

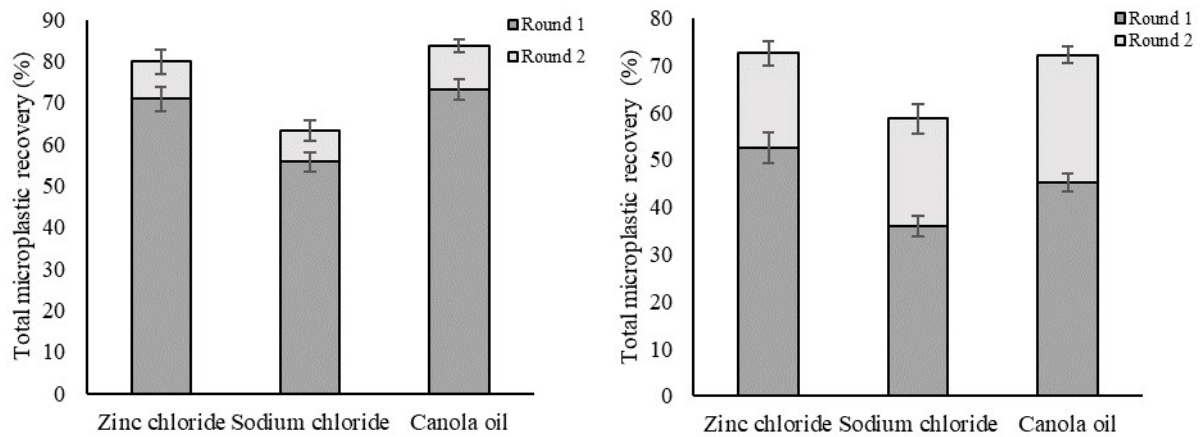

Figure S 3. Total microplastic recovery from inorganic soils using the three density separation methods (ZnCl<sub>2</sub>, NaCl and canola oil) with (+US) and without (-US) the inclusion of an ultrasound step

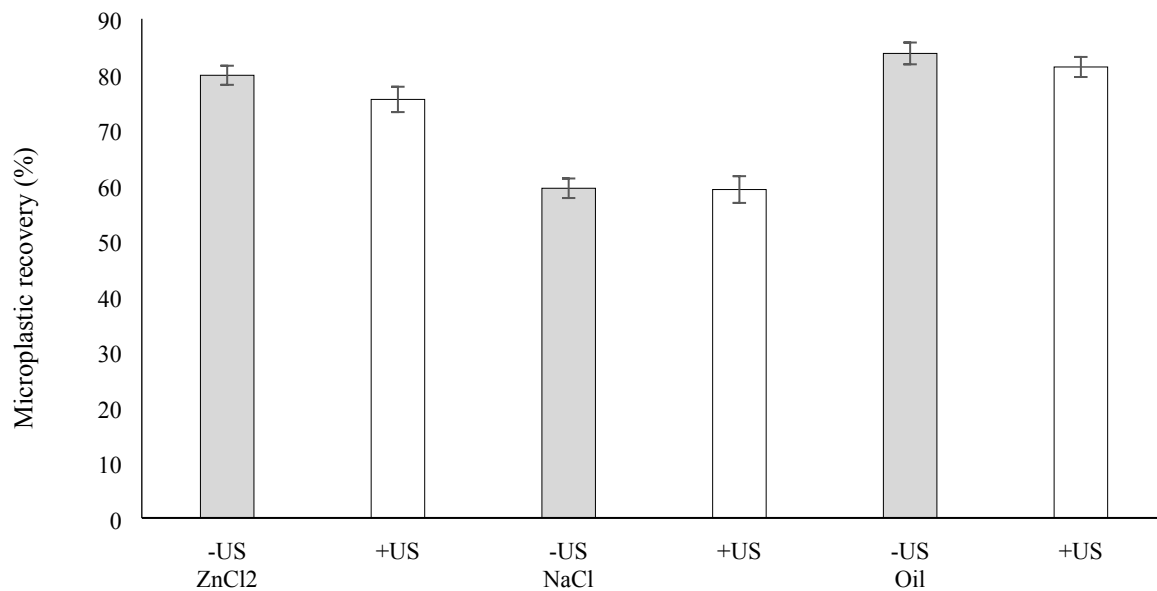

Figure S 4. FT-IR spectra for a sample of microplastic spikes using the experiment when treated with density treatments involving NaCl, ZnCl<sub>2</sub>, oil and ultrasound (a. big PVC b. small PVC c. small PS d. small LDPE).

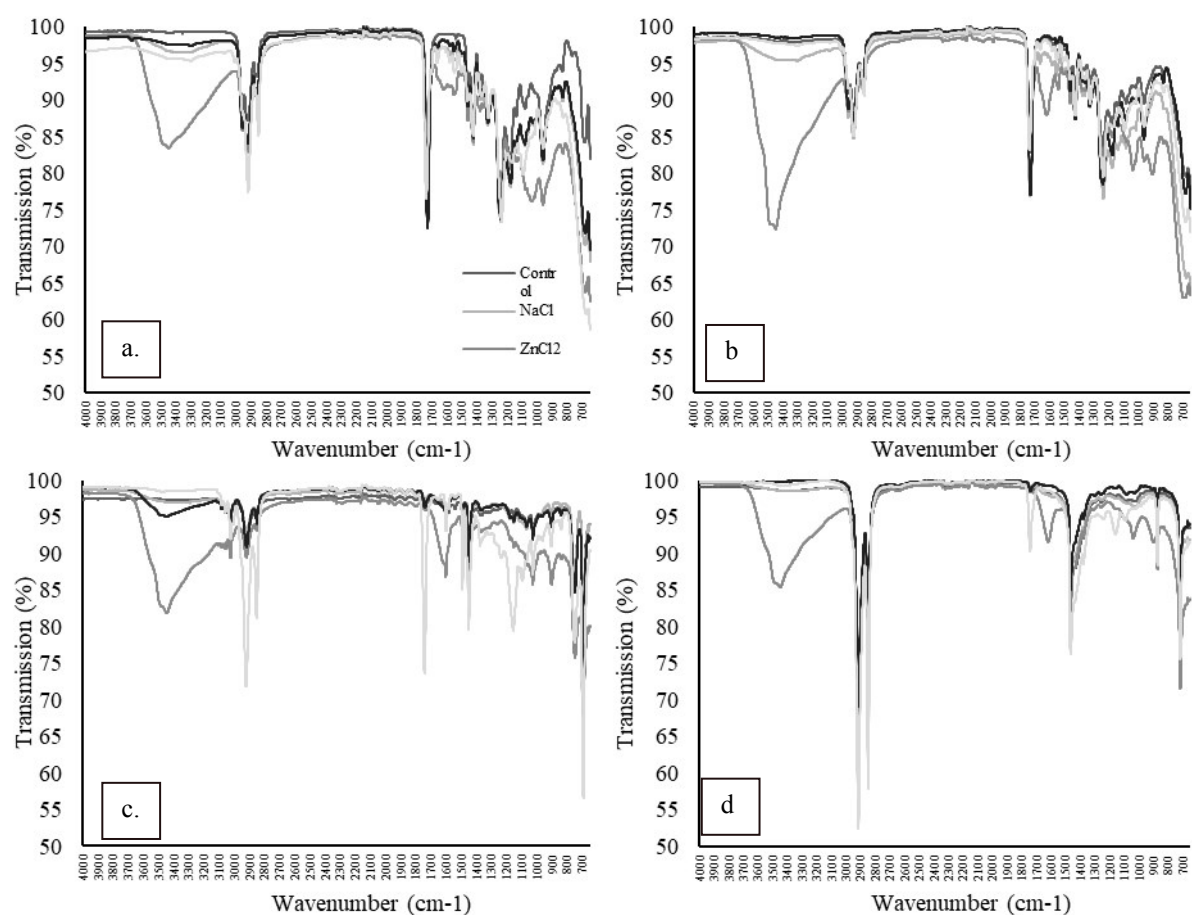



Figure S 5. FT-IR spectra for a sample of microplastic spikes using the experiment when treated with digestion treatments involving Fenton's reagent, potassium hydroxide and hydrogen peroxide at 40 and 50°. (a. small LDPE b. PET fragments c. PP fragments d. large PVC )

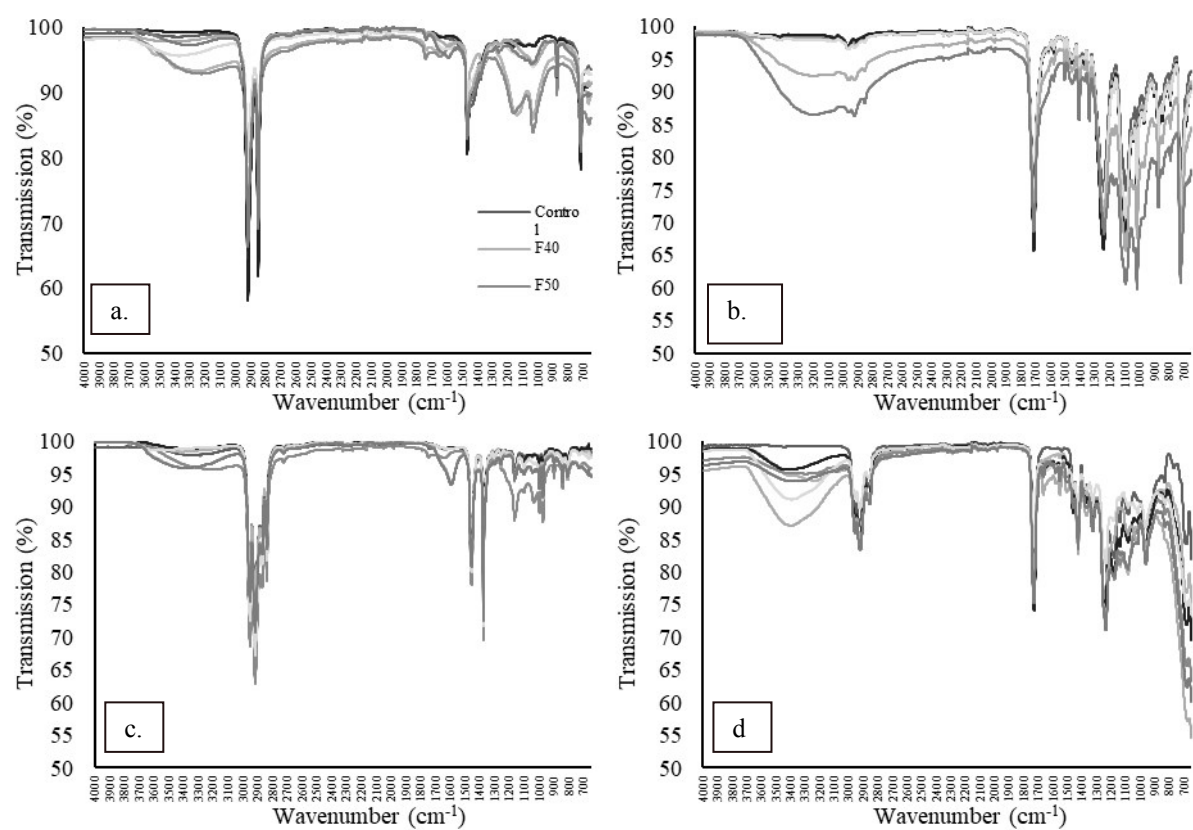

Supplement: d0ay02086a1.pdf [file d0ay02086a1.pdf]
